# Supplementary material
Source: ML conference proceedings conference paper supplement (https://proceedings.neurips.cc/paper_files/paper/2008/hash/49ae49a23f67c759bf4fc791ba842aa2-Abstract.html)
Supplement: Supplementary file 2 [file 49ae49a23f67c759bf4fc791ba842aa2-Supplemental.zip]

Archive with 1 entries (1 files):
- supplement.pdf
